# Supplementary material
Source: PubMed Central journal article supplement (PMC5628111)

## 1 SUPPLEMENTARY MATERIAL

### 2 **Supplemental Figure S1. Induction of epitope-specific T cells by sorted adult CD103+ DCs. A)**

3 Gating of CD103+ DCs and CD11b+ DCs in the MLN of adult and neonatal mice. Live singlets  
4 were gated prior to gating on the CD11c+, Class II<sup>hi</sup> DC population. This population was further  
5 broken down into CD103+ DCs and CD11b+ DCs. B) An example of raw data obtained from an  
6 *in vitro* coculture experiment showing the induction of proliferation of K<sup>d</sup>M2<sub>82-90</sub> and D<sup>b</sup>M<sub>187-195</sub>-  
7 specific cells by FACS-sorted CD103+ DCs sorted from the MLN of adult mice on the indicated  
8 days post-infection. Mice were infected on different days in order to harvest MLN from all time  
9 points post-infection and perform the coculture on one day with the same reporter T cell  
10 populations.

11

### 12 **Supplemental Figure S2. Frequency and number of CD8+ T cells in RSV-infected adult and**

13 **neonatal wild-type and Batf3<sup>-/-</sup> mice.** CD8+ T cell frequency and numbers in the lung and MLN  
14 7 days post-infection (A-D) and the frequency and number of CD8+ T cells specific for D<sup>b</sup>M<sub>187-195</sub>  
15 and K<sup>d</sup>M2<sub>82-90</sub> specific cells in the MLN of wild-type and Batf3-deficient adults and neonates 7  
16 days post-RSV infection (E-H). Data are representative of 3 independent experiments with 5-8  
17 mice/group. P values indicated are from a t-test between wild-type and Batf3<sup>-/-</sup> mice of the  
18 same age.

19

### 20 **Supplemental Figure S3. Higher K<sup>d</sup>M2<sub>82-90</sub>-specific responses in the lungs of Batf3<sup>-/-</sup> deficient**

21 **neonates are due to the lack of competition from the D<sup>b</sup>M<sub>187-195</sub>-specific response.** Wild-type

22 and Batf3-deficient neonatal mice were infected with RSV-N191S, an RSV virus that does not

1 stimulate a response to the D<sup>b</sup>M<sub>187-195</sub> epitope due to a mutation in the P5 anchor residue. The  
2 frequency and number of K<sup>d</sup>M<sub>282-90</sub>-specific cells were measured by tetramer staining in the  
3 lung and MLN 7 days post-infection. Results shown are combined data from two litters of wild-  
4 type and two litters of Batf3<sup>-/-</sup> deficient neonates.

5

6 **Supplemental Figure S4. Influenza/PR8-infected neonatal mice possess two populations**

7 **within the CD103<sup>+</sup> DC subset.** Seven-day-old mice were infected intranasally with 600 TCID<sub>50</sub>

8 of influenza/PR8. MLN were harvested from naïve mice, and mice at days 1-3 post-infection

9 for surface staining of lung-migratory dendritic cell populations. The sample shown is

10 representative of several pools of MLN from neonatal mice infected with influenza/PR8.

11

12 **Supplemental Figure S5. Phenotypic comparison of neonatal CD11b<sup>+</sup> DCs and adult CD11b<sup>+</sup>**

13 **DCs in the MLN of mice two days post-infection.** A) Scatter characteristics and comparison of

14 expression of lineage-defining markers between neonatal and adult CD11b<sup>+</sup> DCs. B)

15 Background (FMO)-subtracted median fluorescence intensity (MFI) is presented for CD80,

16 CD86, CD24, CD205, and the MHC Class I molecules K<sup>d</sup> and D<sup>b</sup> on neonatal and adult CD11b<sup>+</sup>

17 DCs. Data are representative of two independent experiments with 3-4 mice/group. \* indicates

18 p<0.05, \*\*\* indicates p<0.001.

19

20 **Supplemental Figure S6. Neonatal CD103<sup>lo</sup> DCs are capable of fully presenting exogenously**

21 **delivered M<sub>282-90</sub> peptide.** CD103<sup>lo</sup> and CD103<sup>hi</sup> dendritic cells sorted from neonates 2 days

22 post-infection were pulsed with 10<sup>-6</sup>M or 10<sup>-8</sup>M of M<sub>282-90</sub> (SYIGSINNI) peptide for one hour

- 1 prior to washing and co-culturing with CFSE-labeled K<sup>d</sup>M2<sub>82-90</sub>-specific CD8<sup>+</sup> T cells. The percent
- 2 of transgenic cells induced to proliferate after three days in culture was calculated using Flowjo
- 3 software.

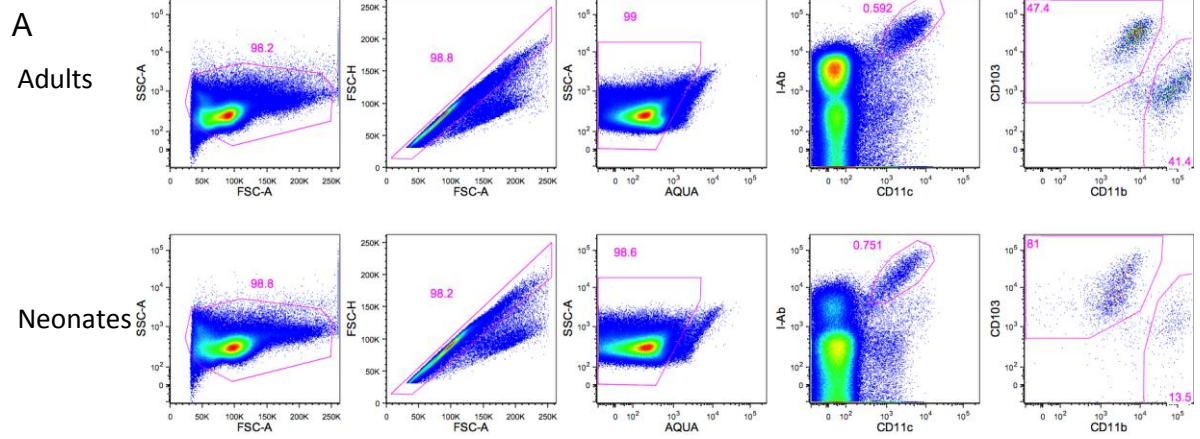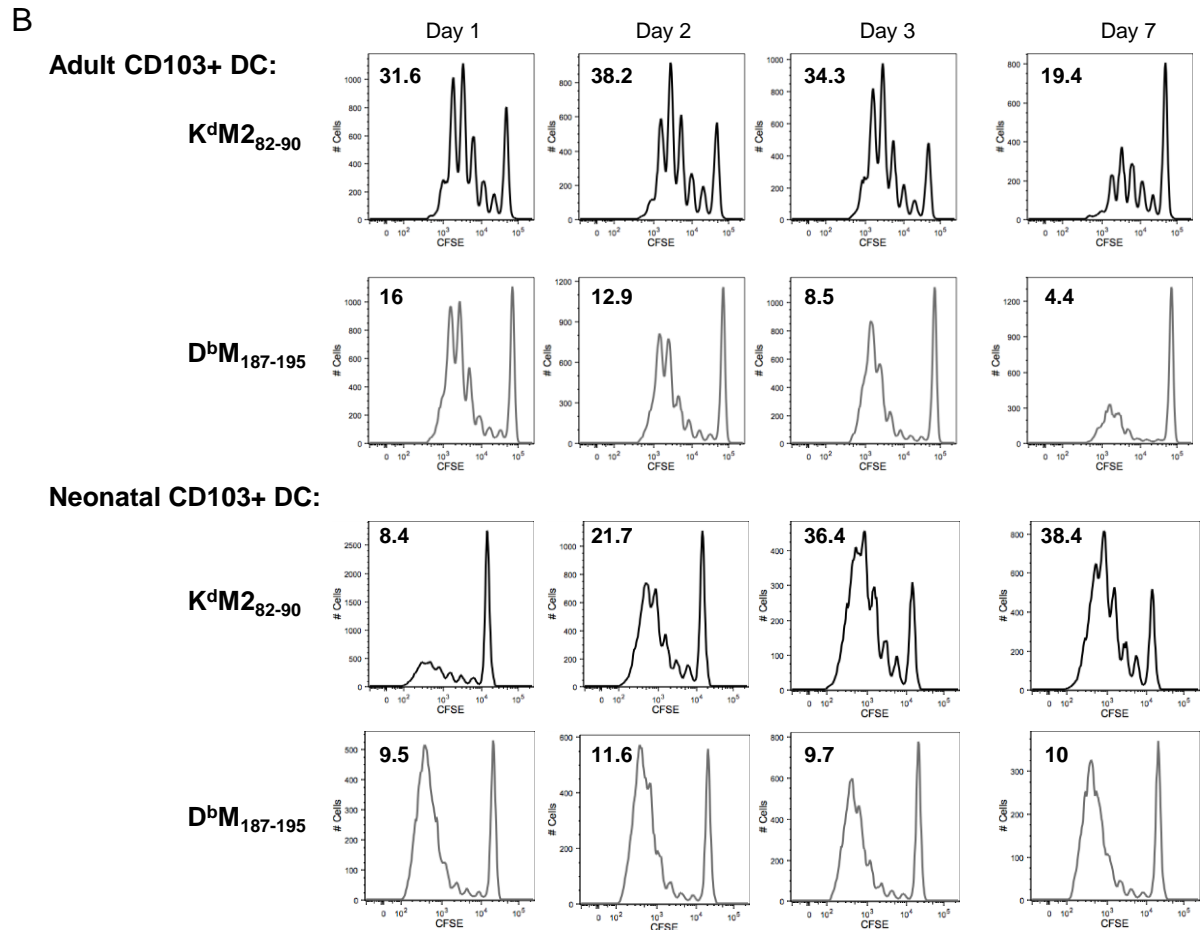

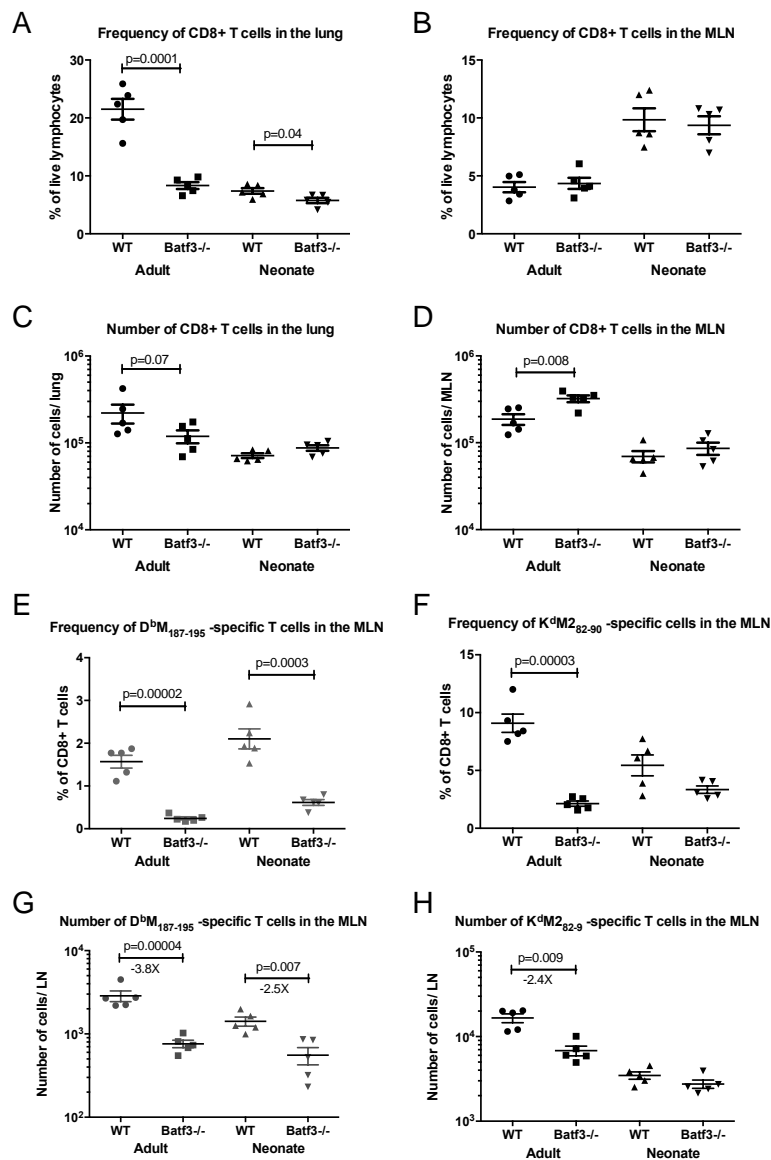



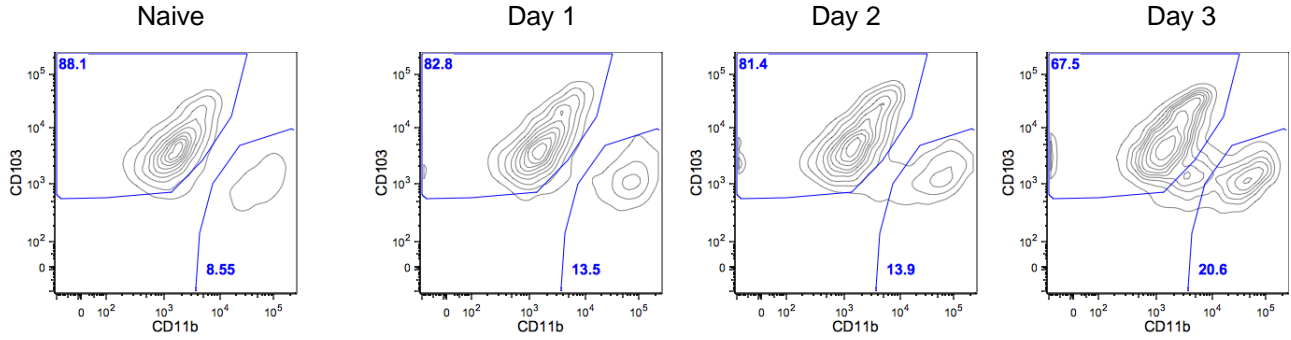

A

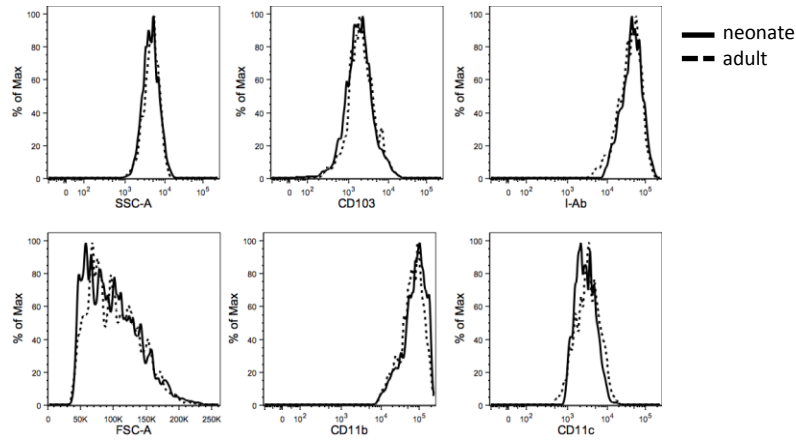

B

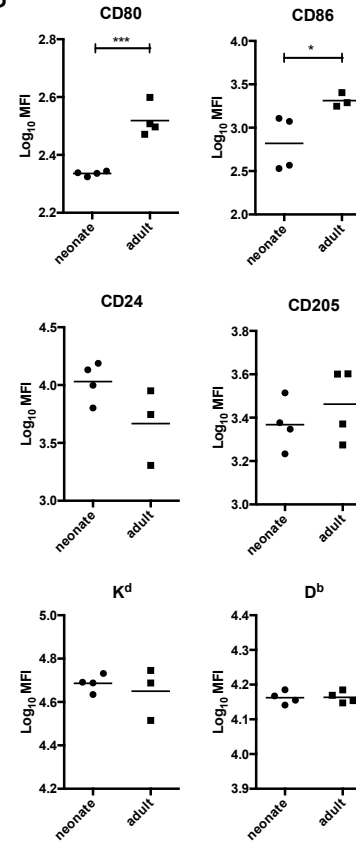



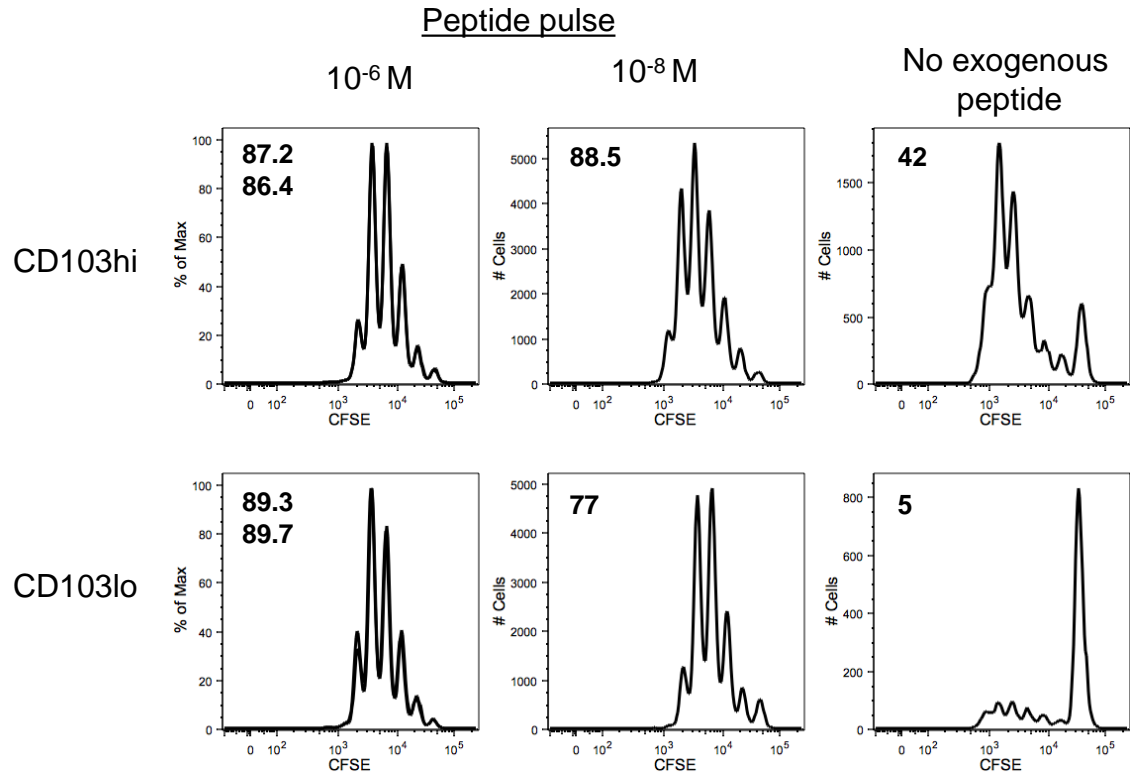

Supplement: NIHMS857879-supplement-supplement_1.pdf [file NIHMS857879-supplement-supplement_1.pdf]
